# Supplementary material for: Causal relations among starch fine molecular structure, lamellar/crystalline structure and in vitro digestion kinetics of native rice starch
Source: Royal Society of Chemistry journal article supplement (doi:10.1039/d0fo02934c), 2020-12-11
Supplement: d0fo02934c1.pdf [file d0fo02934c1.pdf]

1 Causal relations among starch fine molecular structure,  
2 lamellar/crystalline structure and *in vitro* digestion  
3 kinetics of native rice starch

4

5 Cheng Li<sup>1\*</sup>, Yiming Hu<sup>2</sup>, Fangting Gu<sup>3</sup> and Bo Gong<sup>3</sup>

6

7 <sup>1</sup>School of Medical Instrument and Food Engineering, University of Shanghai for Science and  
8 Technology, Shanghai 200093, China

9 <sup>2</sup>Department of Pathology, Zhongshan Hospital, Fudan University, Shanghai 200031, China

10 <sup>3</sup>Key Laboratory of Plant Functional Genomics of the Ministry of Education, Jiangsu Key  
11 Laboratory of Crop Genetics and Physiology, College of Agriculture, Yangzhou University,  
12 Yangzhou 225009, P.R. China

13

14

15

16

17

18

19

20 \*Corresponding author:

21 Cheng.li1@uqconnect.edu.au

22

23

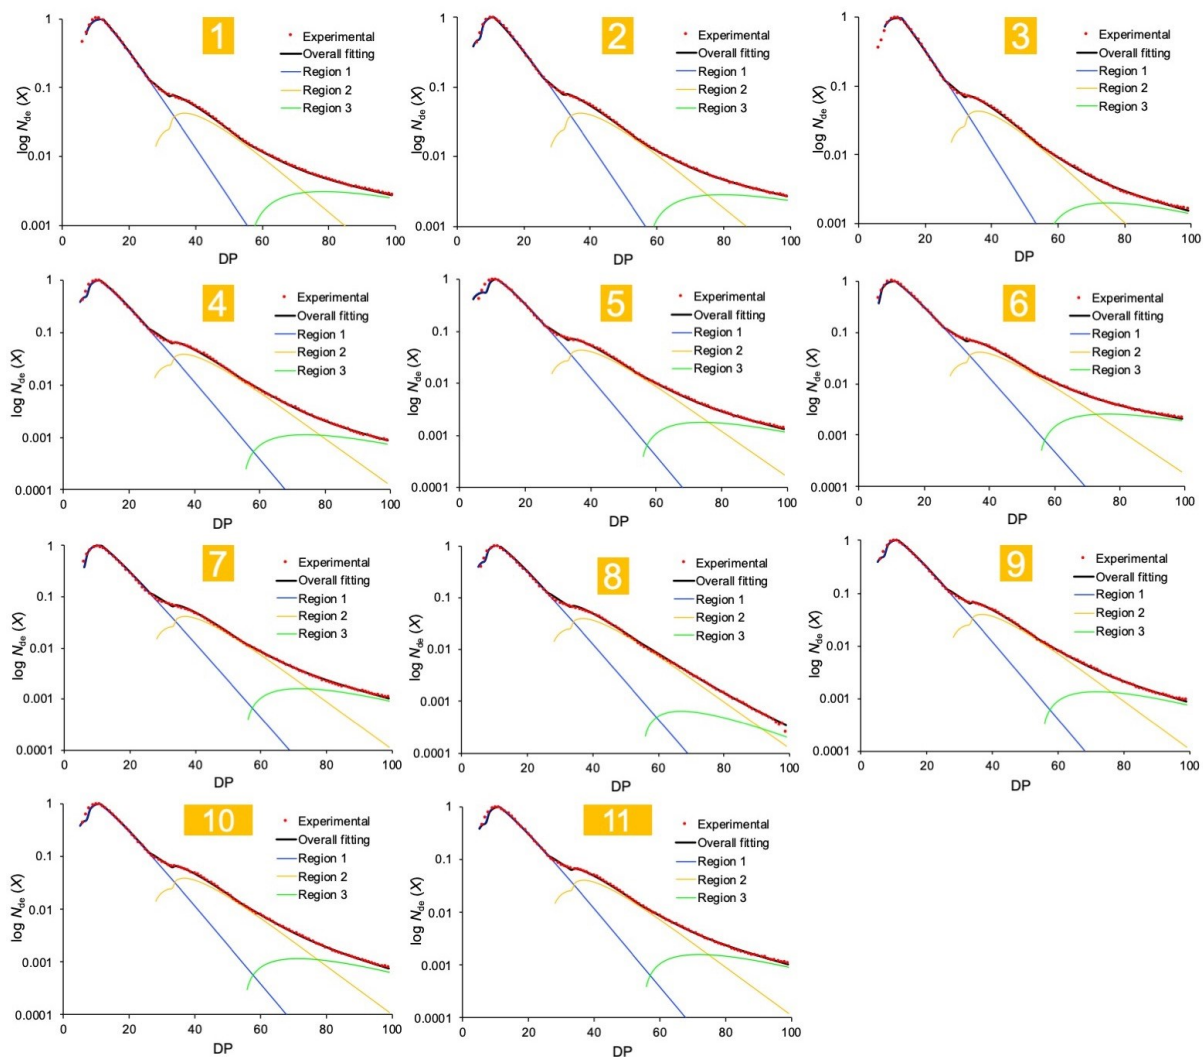

24

25 Figure S1. Amylopectin CLDs fittings for the 11 different rice starches.

26

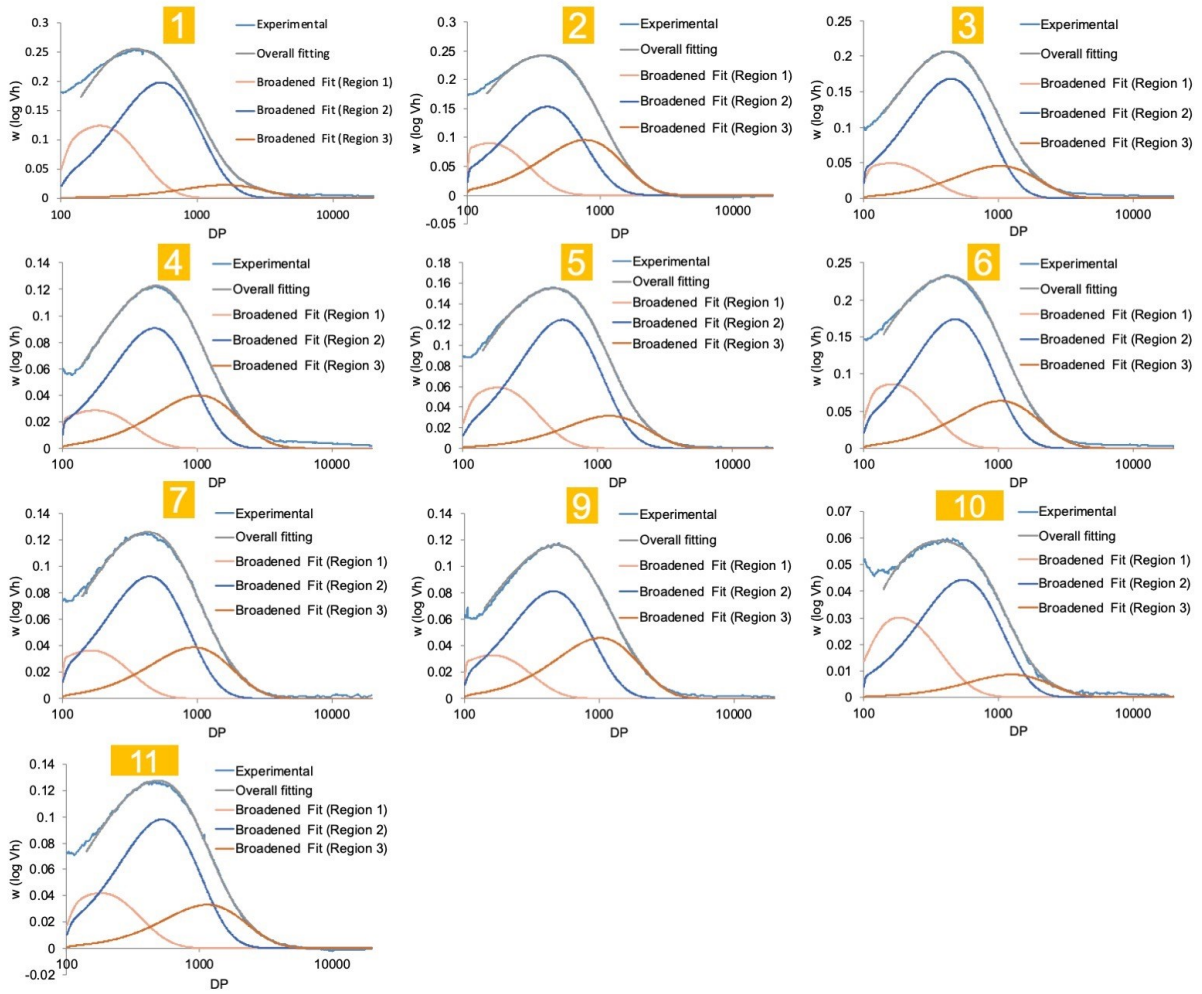

27

28 Figure S2. Amylose CLDs fittings for the 11 different rice starches.

29

30

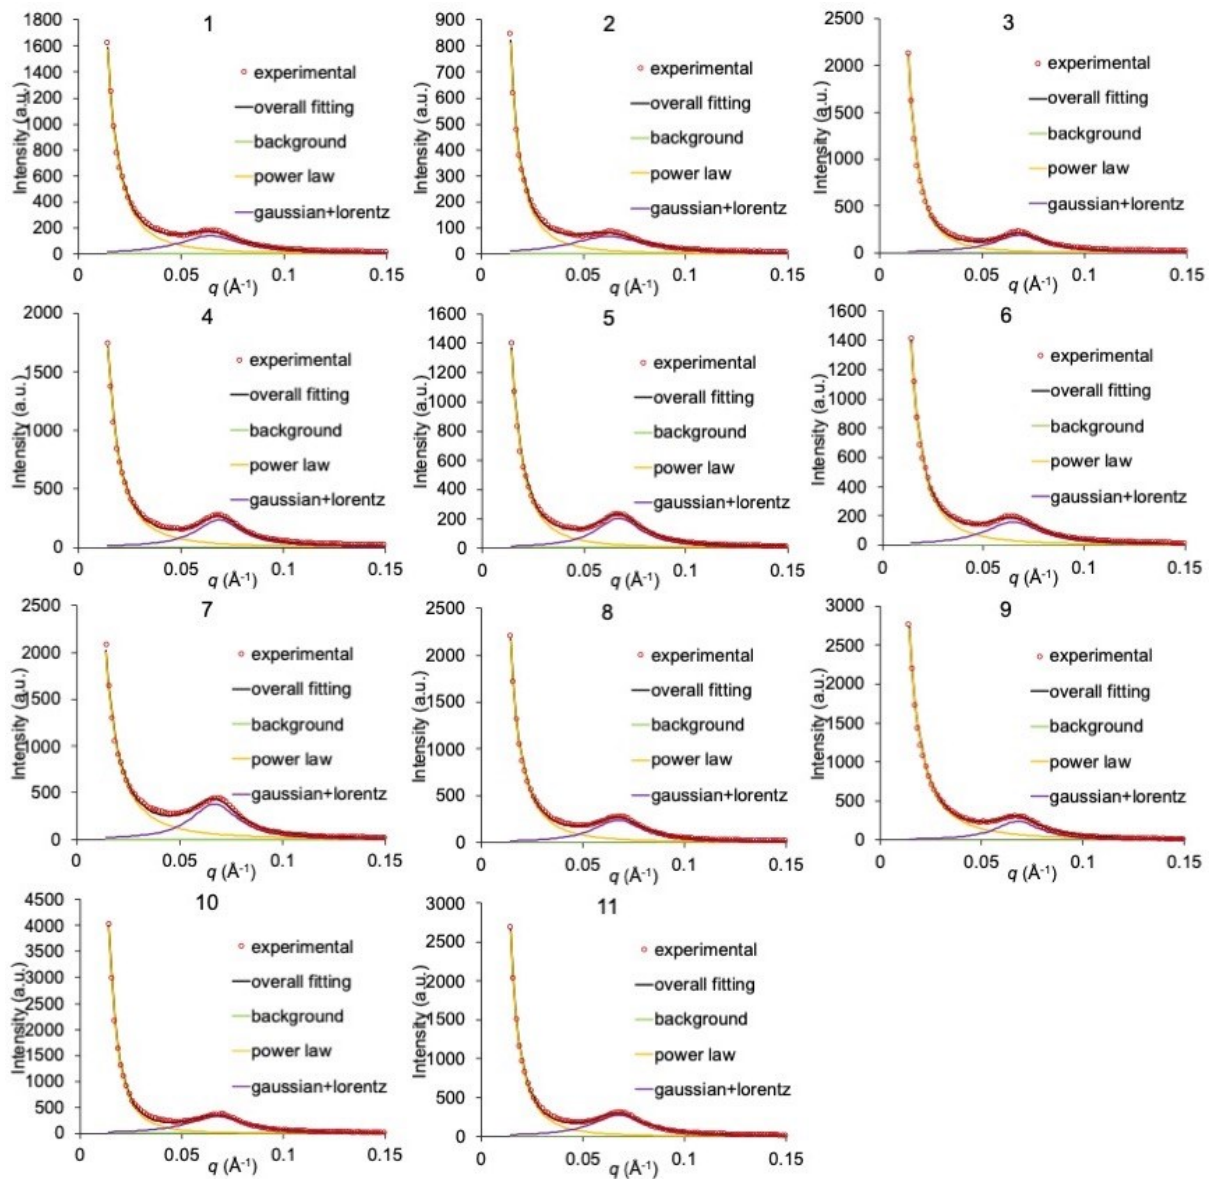

31

32 Figure S3. SAXS pattern fitting curves for the 11 different rice starches.

33

34

35
